# Supplementary material for: The Retropepsin-Type Protease APRc as a Novel Ig-Binding Protein and Moonlighting Immune Evasion Factor of Rickettsia
Source: PubMed Central journal article supplement (PMC8649778; doi:10.1128/mbio.03059-21), 2021-12-07
Supplement: mbio.03059-21-st001.pdf [file mbio.03059-21-st001.pdf]

**Table S1.** DNA constructs used in this study

| <i>DNA construct</i>                                | <i>Primers</i>                                                                                                                                                                                                                                           |
|-----------------------------------------------------|----------------------------------------------------------------------------------------------------------------------------------------------------------------------------------------------------------------------------------------------------------|
| <i>pET_APRc<sub>144-231</sub>HisShort</i>           | forward primer:<br>5'-GCCTCTGATATTGCACTGAC-3'<br>reverse primer:<br>5'-CATATGTATATCTCCTTCTTAAAGTTAAACAAA-3'                                                                                                                                              |
| <i>pET_APRc(Δ160-164)<sub>110-231</sub>HisShort</i> | forward primer:<br>5'-TATACCCGTACGTACCTGACG-3'<br>reverse primer:<br>5'-ATC GAAACCCAGTTTCTGC-3'                                                                                                                                                          |
| <i>pET_APRc(Δ157-166)<sub>110-231</sub>HisShort</i> | forward primer:<br>5'-CGTACGTACCTGACGGCC-3'<br>reverse primer:<br>5'-CAGTTTCTGCGCATCTTCTT-3'                                                                                                                                                             |
| <i>pET_APRc(Δ150-166)<sub>110-231</sub>HisShort</i> | forward primer:<br>5'-CGTACGTACCTGACGGCC-3'<br>reverse primer:<br>5'-CGTCAGTGCAATATCAGAGG-3'                                                                                                                                                             |
| <i>pET_APRc<sub>110-173</sub>HisShort</i>           | forward primer:<br>5'-CACCACCACCACCACCAC-3'<br>reverse primer:<br>5'-GTTGGCCGTCAG GTACGT-3'                                                                                                                                                              |
| <i>pET_APRc<sub>110-189</sub>HisShort</i>           | forward primer:<br>5'-CACCACCACCACCACCAC-3'<br>reverse primer:<br>5'-GCCGATAACCAC GCTGTT-3'                                                                                                                                                              |
| <i>pET_APRc<sub>110-218</sub>HisShort</i>           | forward primer:<br>5'-CACCACCACCACCACCAC-3'<br>reverse primer:<br>5'-TTTAAAACGTTC CAGCAGAGAC-3'                                                                                                                                                          |
| <i>pET_APRc<sub>110-225</sub>HisShort</i>           | forward primer:<br>5'-CACCACCACCACCACCAC-3'<br>reverse primer:<br>5'-ATC TTTATCGATGCGGAAACC-3'                                                                                                                                                           |
| <i>pCoofy_HisAPRC<sub>110-231</sub>-avi</i>         | forward primer:<br>5'GGATCCGGACTGAACGACATCTTC-3'<br>reverse primer:<br>5'-GGGCCCTGGAACAGAACTTC-3'<br>forward primer:<br>5' AAGTTC TGTTCAGGGGCCCCGAAGTTGGCGAAATTATCATT-3'<br>reverse primer:<br>5' GAAGATGTCGTTCCAGTCCGGATCCATAATTCAGAATCAGCAGATCTTTAT-3' |
